# Supplementary material
Source: PubMed Central journal article supplement (PMC10066382)
Supplement: 41422_2023_782_MOESM4_ESM.pdf [file 41422_2023_782_MOESM4_ESM.pdf]

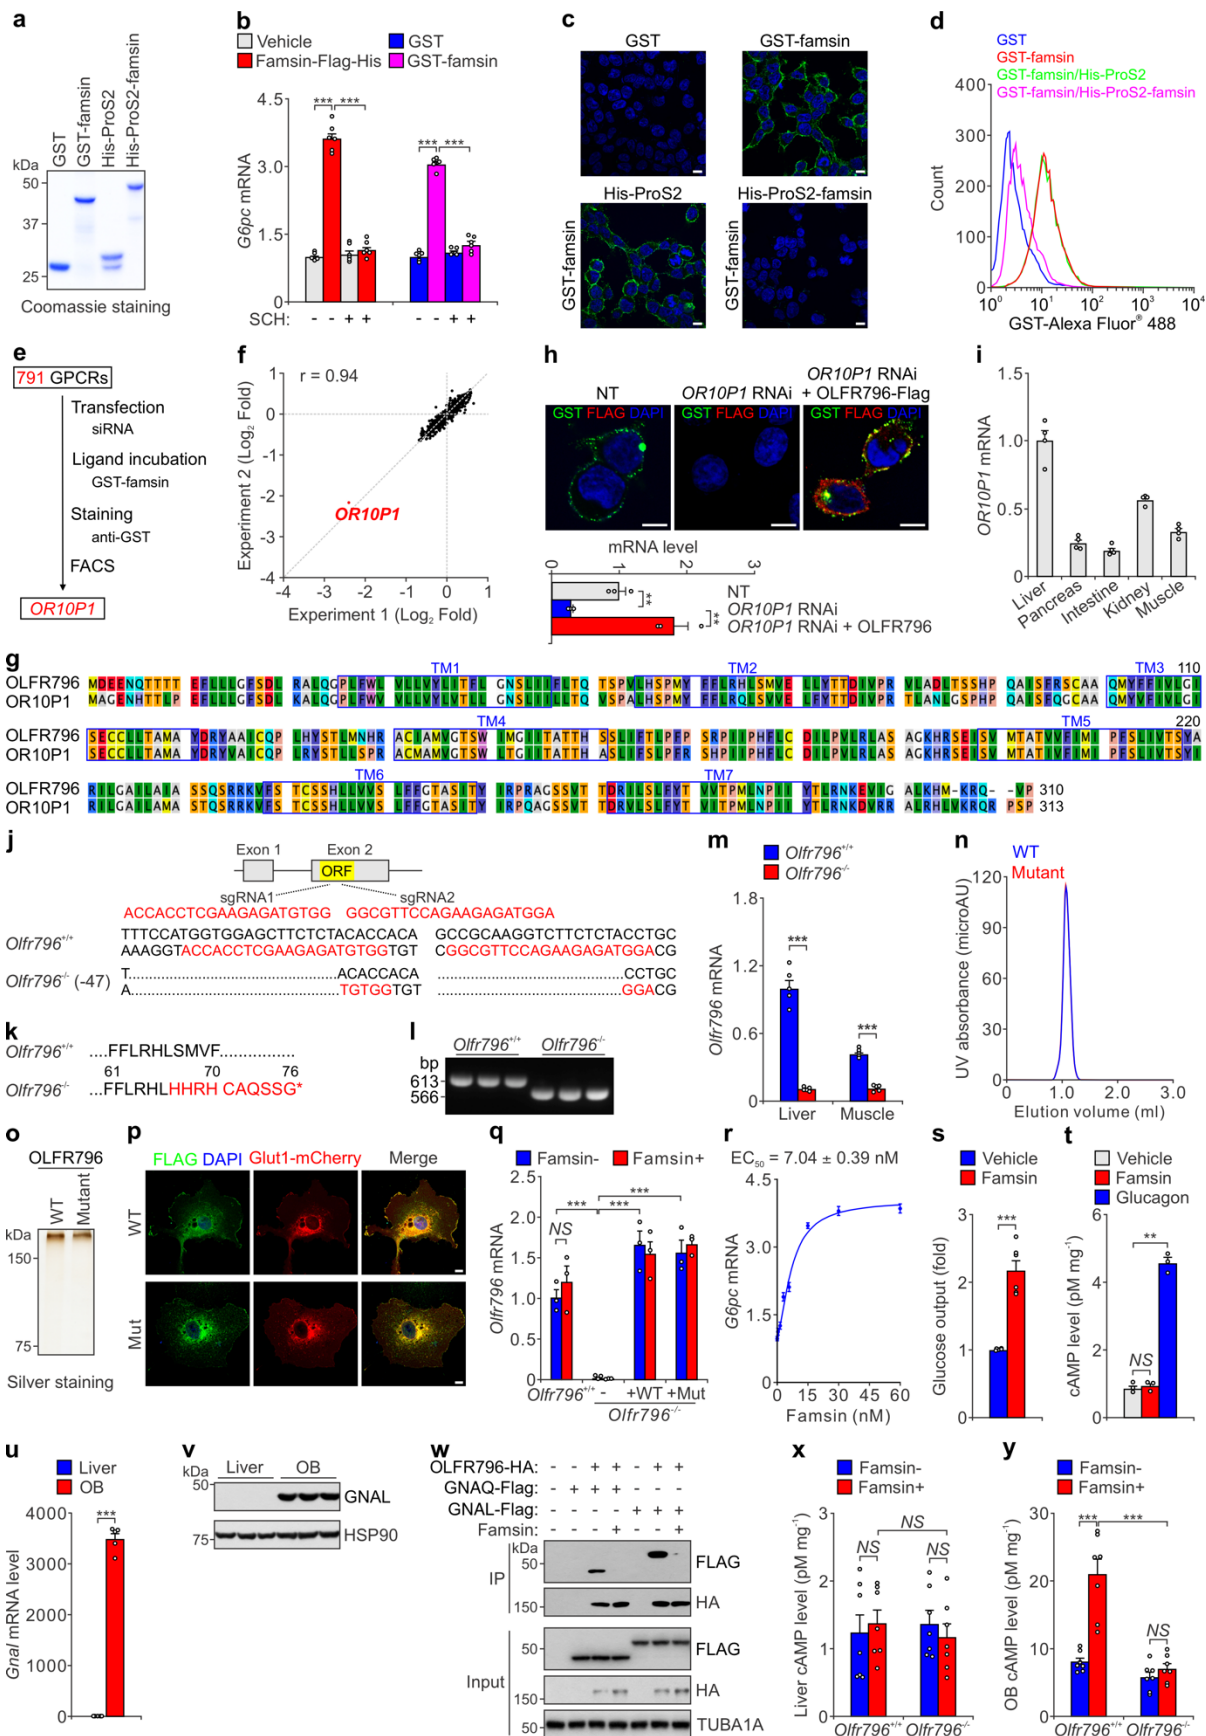

**Supplementary information, Fig. S4. Identification of OLFR796 as a receptor of famsin.**

**a** Coomassie staining showing SDS-PAGE separation of GST, GST-famsin, His-ProS2 and His-ProS2-famsin purified from *E. coli*. **b** Effect of famsin-Flag-His purified from Hi-5 cells and GST-famsin purified from *E. coli* on relative *G6pc* mRNA levels in mouse primary hepatocytes in the presence or absence of SCH-202676 (SCH, 10  $\mu$ M). Data are shown as mean  $\pm$  s.e.m. Comparison of different groups was carried out using two-way ANOVA followed by Tukey's test. \*\*\* $p < 0.001$ .  $n = 6$ . **c-d** Binding assay on HEK293T cells evaluated by immunostaining (**c**) or flow cytometry (**d**). 100 nM GST or GST-famsin was incubated with HEK293T cells. For competition binding, cells were pretreated with 5  $\mu$ M His-ProS2 or His-ProS2-famsin for 30 min. Scale bars, 10  $\mu$ m. **e** siRNA library screening for GPCRs that modulate the binding of GST-famsin in HEK293T cells. **f** Correlation between the two replicates of the primary siRNA screen. Results are shown as fold change (on a  $\log_2$  scale) of famsin binding in siRNA knockdown cells relative to cells transfected with non-targeting siRNA. Spearman's rank correlation coefficient ( $r = 0.94$ ) between the two replicates is shown. **g** Alignment of human OR10P1 and mouse OLFR796. The predicted transmembrane domains (TM) are surrounded by the blue boxes. **h** Effect of *OR10P1* knockdown or addition of OLFR796-Flag on GST-famsin binding (top panel) and mRNA level of *OR10P1* or *Olfir796* (bottom panel) in HEK293T cells. A mixture of siRNAs (5'-CGATCATCCCGCACTTCT-3', 5'-CCTCTTACATCCGCATCCT-3' and 5'-TGATGACAGCCACCATAGT-3') that target *OR10P1* was used in this assay. NT, non-target RNAi. Scale bars, 10  $\mu$ m. Data are shown as mean  $\pm$  s.e.m. Comparison of different groups was carried out using one-way ANOVA followed by Tukey's test. \*\* $p < 0.01$ .  $n = 3$ . **i** qPCR results showing relative mRNA levels of *OR10P1* in human tissues. Data are shown as mean  $\pm$  s.e.m.  $n = 4$ . **j** Generation of *Olfir796*<sup>-/-</sup> mice by CRISPR-Cas9. A deletion of 47 bp was introduced in exon 2 of the *Olfir796* gene. **k** The partial N-terminal sequence of WT OLFR796 and the full sequence of the truncated OLFR796 protein product in *Olfir796*<sup>-/-</sup> mice are shown. The frame-shifted amino acids of OLFR796 generated by the deletion in *Olfir796*<sup>-/-</sup> mice are shown in red. **l** PCR analysis showing *Olfir796* fragments generated from *Olfir796*<sup>+/+</sup> and *Olfir796*<sup>-/-</sup> mice. **m** Relative mRNA levels of *Olfir796* in the liver or skeletal muscle extracts from 8-10-week-old male *Olfir796*<sup>+/+</sup> and *Olfir796*<sup>-/-</sup> mice. Data are shown as mean  $\pm$  s.e.m. Comparison of different groups was carried out using unpaired two-tailed Student's *t*-test. \*\*\* $p < 0.001$ .  $n = 5$  mice. **n** A representative chromatogram from size exclusion chromatography of OLFR796-Flag-His or its mutant (R187D, R195D and E197A) purified from Hi-5 cells. microAU, micro-ultraviolet absorbance at 280 nm. **o** Silver staining showing purified OLFR796-Flag-His and its mutant (R187D, R195D and E197A) separated by SDS-PAGE. **p** Similar cellular localization of WT OLFR796 and its mutant (R187D, R195D and E197A) evaluated by anti-FLAG staining in Cos7 cells. Scale bars, 10  $\mu$ m. **q** qPCR results showing relative expression of *Olfir796* in *Olfir796*<sup>+/+</sup> or *Olfir796*<sup>-/-</sup> primary hepatocytes with or without overexpression of *Olfir796* in the presence or absence of famsin (30 nM). Data are shown as mean  $\pm$  s.e.m. Comparison of different groups was carried out using two-way ANOVA followed by Tukey's test. \*\*\* $p < 0.001$ . NS, no statistical significance.  $n = 3$ . **r** Relative *G6pc* mRNA levels following treatment with different doses of famsin in mouse primary hepatocytes. Data are shown as mean  $\pm$  s.e.m.  $n = 6$ . **s** Effect of famsin (30 nM) on glucose output in mouse primary hepatocytes. Data are shown as mean  $\pm$  s.e.m. Comparison of different groups was carried out using unpaired two-tailed Student's *t*-test. \*\*\* $p < 0.001$ .  $n = 6$ . **t** Effect of 10 min treatment with famsin (30 nM) or glucagon (100 nM) on cellular cAMP levels in mouse primary hepatocytes. Data are shown as mean  $\pm$  s.e.m. Comparison of different groups was carried out using one-way ANOVA followed by Tukey's test. \*\* $p < 0.01$ . NS, no statistical significance.  $n = 3$ . **u** qPCR results showing relative expression of *Gnal* in the liver or OB extracts from 8-10-week-old male mice. Data are shown as mean  $\pm$  s.e.m. Comparison of different groups was carried out using unpaired two-tailed Student's *t*-test. \*\*\* $p < 0.001$ .  $n = 5$  mice. **v** Immunoblot showing relative expression of GNAL in the liver or OB extracts from 8-10-week-old male mice. **w** Co-immunoprecipitation showing the association of OLFR796-HA with GNAQ-Flag or GNAL-Flag in HEK293T cells treated with or without famsin (30 nM) for 10 min. **x-y** Effect of famsin on cAMP levels of liver (**x**) or OB (**y**) extracts from 8-10-week-old *Olfir796*<sup>+/+</sup> and *Olfir796*<sup>-/-</sup> male mice. Data are shown as mean  $\pm$  s.e.m. Comparison of different groups was carried out using two-way ANOVA followed by Tukey's test. \*\*\* $p < 0.001$ . NS, no statistical significance.  $n = 5$  mice.
