# Supplementary material
Source: PubMed Central journal article supplement (PMC10066382)
Supplement: 41422_2023_782_MOESM6_ESM.pdf [file 41422_2023_782_MOESM6_ESM.pdf]

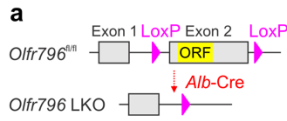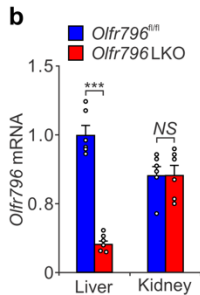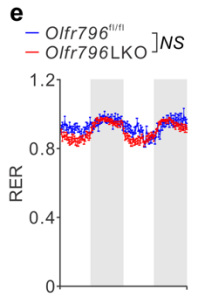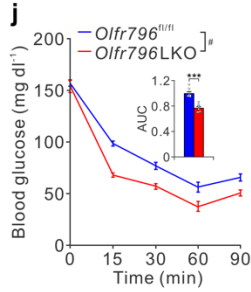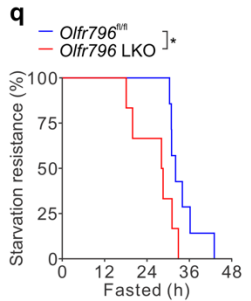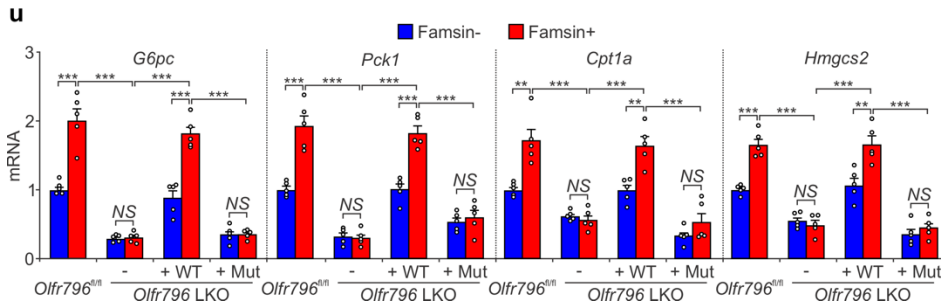

**c**

|                                                  | <i>Olf796<sup>fl/fl</sup></i> | <i>Olf796<sup>LKO</sup></i> | Mice (no.) |
|--------------------------------------------------|-------------------------------|-----------------------------|------------|
| Body weight (g)                                  | 25.84 ± 0.96                  | 26.43 ± 0.73                | 8          |
| Fat mass (%)                                     | 6.87 ± 0.59                   | 7.01 ± 0.79                 | 8          |
| Food intake (g day <sup>-1</sup> )               | 4.44 ± 0.19                   | 4.47 ± 0.10                 | 8          |
| Water intake (g day <sup>-1</sup> )              | 3.49 ± 0.18                   | 3.32 ± 0.12                 | 8          |
| Blood glucose (mg dl <sup>-1</sup> , fed)        | 155.48 ± 9.08                 | 153.68 ± 4.02               | 8          |
| Blood glucose (mg dl <sup>-1</sup> , fasted)     | 86.18 ± 2.37                  | 70.20 ± 1.44***             | 8          |
| Plasma TGs (mg dl <sup>-1</sup> , fed)           | 80.48 ± 9.93                  | 81.70 ± 11.74               | 8          |
| Plasma TGs (mg dl <sup>-1</sup> , fasted)        | 90.74 ± 11.86                 | 127.66 ± 14.29              | 8          |
| Hepatic TGs (mg g <sup>-1</sup> , fed)           | 10.78 ± 1.31                  | 9.62 ± 1.00                 | 8          |
| Hepatic TGs (mg g <sup>-1</sup> , fasted)        | 53.29 ± 5.74                  | 50.37 ± 4.80                | 8          |
| Plasma cholesterol (mg dl <sup>-1</sup> , fed)   | 98.44 ± 5.89                  | 105.93 ± 5.31               | 8          |
| Hepatic cholesterol (mg g <sup>-1</sup> , fed)   | 1.80 ± 0.09                   | 1.82 ± 0.05                 | 8          |
| Plasma insulin (ng ml <sup>-1</sup> , fed)       | 1.13 ± 0.12                   | 0.93 ± 0.11                 | 8          |
| Plasma insulin (ng ml <sup>-1</sup> , fasted)    | 0.126 ± 0.005                 | 0.126 ± 0.006               | 8          |
| Hepatic glycogen (mg g <sup>-1</sup> , fed)      | 34.11 ± 1.68                  | 29.46 ± 1.98                | 8          |
| Hepatic glycogen (mg g <sup>-1</sup> , fasted)   | 0.20 ± 0.03                   | 0.21 ± 0.03                 | 8          |
| β-Hydroxybutyrate (mM, fasted)                   | 1.44 ± 0.14                   | 1.01 ± 0.05*                | 8          |
| Hepatic acetyl-CoA (nM g <sup>-1</sup> , fasted) | 50.53 ± 1.18                  | 36.79 ± 1.34***             | 8          |

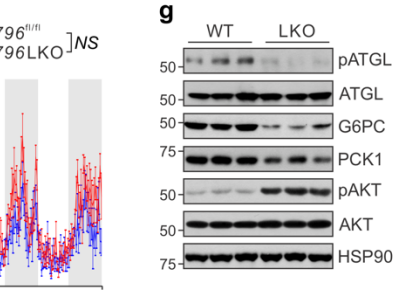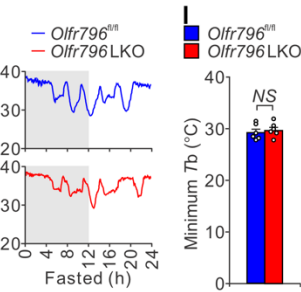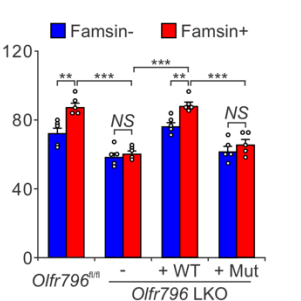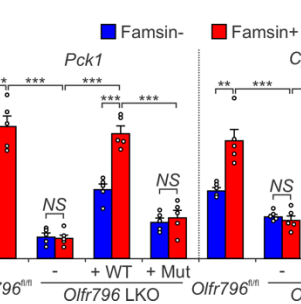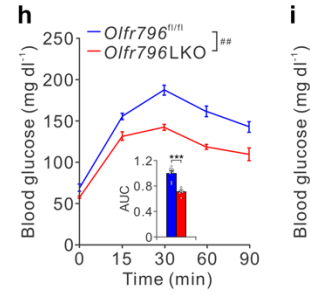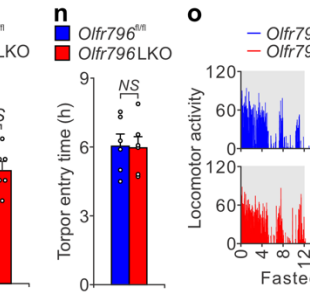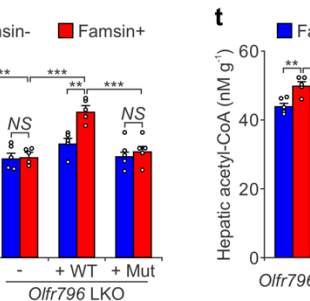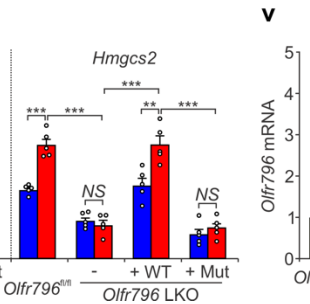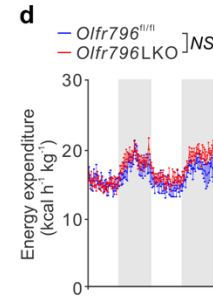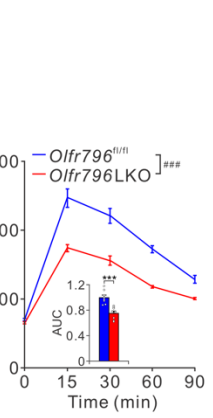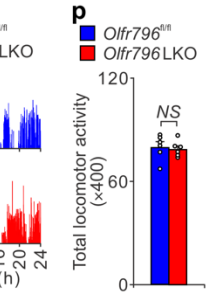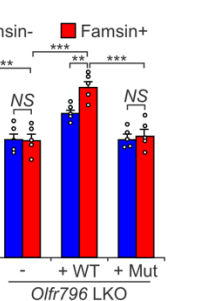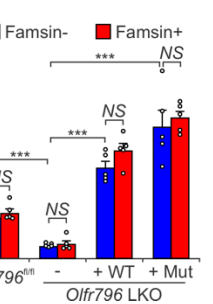

**Supplementary information, Fig. S6. Effect of *Olfir796* liver-specific knockout on metabolism.**

**a** Generation of *Olfir796* liver-specific knockout (LKO) mice. **b-c** Effect of *Olfir796* LKO on *Olfir796* mRNA levels (**b**) and metabolic parameters (**c**) including body weight, fat mass, food intake, water intake, blood glucose, plasma TGs, hepatic TGs, plasma total cholesterol, hepatic cholesterol, plasma insulin levels, hepatic glycogen, blood glucose, plasma  $\beta$ -hydroxybutyrate and hepatic acetyl-CoA in 8-10-week-old male mice. Data are shown as mean  $\pm$  s.e.m. Comparison of different groups was carried out using unpaired two-tailed Student's *t*-test. \* $p < 0.05$ , \*\*\* $p < 0.001$ . NS, no statistical significance. **d-f** Effect of *Olfir796* LKO on energy expenditure (**d**), RER (**e**) and movement (**f**) in 8-10-week-old male mice. The white and grey backgrounds indicate 12-hr periods of light and darkness, respectively. Data are shown as mean  $\pm$  s.e.m. Comparison of different groups was carried out using two-way ANOVA followed by Tukey's test. NS, no statistical significance.  $n = 8$  mice. **g** Immunoblots showing the effect of *Olfir796* knockout on hepatic lipolysis and gluconeogenesis. **h-j** Pyruvate tolerance test (**h**), glucose tolerance test (**i**) and insulin tolerance test (**j**) results from fasted WT and *Olfir796* LKO mice. The relative area under the curve (AUC) is shown in the inset of each panel. Data are shown as mean  $\pm$  s.e.m. Comparison of different groups was carried out using two-way ANOVA followed by Tukey's test (curve data, # $p < 0.05$ , ## $p < 0.01$ , ### $p < 0.001$ ) or unpaired two-tailed Student's *t*-test (AUC data, \*\*\* $p < 0.001$ ).  $n = 8$  mice. **k-q** Effect of *Olfir796* LKO on torpor evaluated by core body temperature (*T<sub>b</sub>*, **k**), minimum *T<sub>b</sub>* (**l**), torpor frequency (number of torpor bouts, **m**), torpor entry time (**n**), locomotor activity (**o**), relative total locomotor activity (**p**) and starvation resistance (**q**) of fasted 8-week-old male mice. Failure of starvation resistance was judged as *T<sub>b</sub>*  $< 28$  °C following a quick decrease in *T<sub>b</sub>* below the environmental temperature. The white and grey backgrounds (**k** and **o**) indicate 12-hr periods of light and darkness, respectively. Data are shown as mean  $\pm$  s.e.m. Comparison of different groups was carried out using unpaired two-tailed Student's *t*-test (**l-n** and **p**) or log-rank test (**q**). \* $p < 0.05$ . NS, no statistical significance.  $n = 6$  mice. **r-v** Effect of WT OLFR796 or its mutant (Mut; R187D, R195D and E197A) on blood glucose (**r**), plasma  $\beta$ -hydroxybutyrate (**s**), hepatic acetyl-CoA (**t**), relative mRNA levels of genes involved in lipid oxidation (*Cpt1a*), ketogenesis (*Hmgcs2*) and gluconeogenesis (*G6pc*, *Pck1*) (**u**) and relative expression of *Olfir796* (**v**) from liver extracts of overnight fasted 8-10-week-old male mice treated with (Famsin+) or without (Famsin-) famsin. 400  $\mu\text{g kg}^{-1}$  famsin was intraperitoneally injected after 4 hr fasting. Data are shown as mean  $\pm$  s.e.m. Comparison of different groups was carried out using two-way ANOVA followed by Tukey's test. \*\* $p < 0.01$ , \*\*\* $p < 0.001$ . NS, no statistical significance.  $n = 5$  mice.
